# Supplementary material for: Corpus Callosotomy in 3 Cavalier King Charles Spaniel Dogs with Drug-Resistant Epilepsy
Source: MDPI journal article supplement (doi:10.3390/brainsci11111462), 2021-11-04
Supplement: s1 [file s1]

## 5. Frequency of Cluster Seizures

None High  
←————→ mm

6. Frequency of Status Epilepticus ( $\geq 5$  minutes)

None High  
←————→ mm

## 7. Severity of Sedation (consciousness)

Normal Always Sleeping  
←————→ mm

## 8. Severity of Ataxia

None Hard to walk and stand  
←————→ mm

## 9. Degree of Activity/Daily life

Active (same as before the onset of epilepsy) Worst  
←————→ mm

## 10. Appetite

None Too much  
←————→ mm

## 11. Burden of medication on your dog

No drugs Burdensome  
←————→ mm

## 12. The quality of life in your dog

Excellent Worst (considering euthanasia)  
←————→ mm

## 13. The quality of life in the owner (yourself)

Excellent Worst  
←————→ mm

## 14. Satisfaction with the surgery

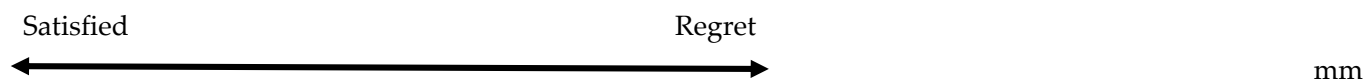**Table S1.** Changes of VAS score in Case 1

| Questions (mm)                    | 1st surgery |         |         |                                     | 2nd surgery |         |          |             |
|-----------------------------------|-------------|---------|---------|-------------------------------------|-------------|---------|----------|-------------|
|                                   | Pre         | Post 3m | Post 6m | Post 9m <sup>†</sup><br>(Preop 2nd) | Post 3m     | Post 6m | Post 12m | Improved %* |
| Frequency of focal seizures       | 95          | 0       | 90      | 100                                 | 97          | 90      | 54       | 24.4        |
| Frequency of generalized seizures | 65          | 0       | 50      | 75                                  | 76          | 50      | 28       | 28.5        |
| Frequency of cluster seizures     | 96          | 0       | 72      | 100                                 | 90          | 72      | 35       | 35.9        |
| Frequency of status epilepticus   | 96          | 0       | 0       | 10                                  | 90          | 0       | 6        | 81.6        |
| Activity level of the dog         | 84          | 0       | 55      | 50                                  | 45          | 55      | 20       | 55.4        |
| Burden of medication on the dog   | 95          | 51      | 90      | 80                                  | 80          | 90      | 87       | 16.1        |
| Appetite of the dog               | 96          | 100     | 62      | 80                                  | 80          | 62      | 56       | 23.6        |
| Ataxia in the dog                 | 69          | 0       | 34      | 47                                  | 67          | 34      | 6        | 54.6        |
| Conscious level in the dog        | 77          | 13      | 52      | 79                                  | 68          | 52      | 70       | 27.7        |
| QOL of the dog                    | 74          | 13      | 44      | 60                                  | 58          | 44      | 12       | 48          |
| QOL of the owner                  | 57          | 15      | 53      | 30                                  | 50          | 53      | 12       | 37.7        |
| Satisfaction with surgery         | NA          | 0       | 6       | 29                                  | 50          | 6       | 5        | 84          |

Values are actual measurements (mm) except the improved percentage. Pre, preoperative; Post 3, 6, (, 9) and 12 m; postoperative months; QOL, quality of life; NA, not applicable. \* Improved percentage (%) =  $100 - \{(\text{average of 6 postoperative values}) \times 100 / \text{pre-operative (1st surgery) value}\}$ . <sup>†</sup> Postoperative 9 months of the 1st surgery was considered to the preoperative values of 2nd surgery.

**Table S2.** Changes of VAS score in Case 2

| Questions (mm)                    | Pre | Post 3m | Post 6m | Post 12m | Improved %* |
|-----------------------------------|-----|---------|---------|----------|-------------|
| Frequency of focal seizures       | 85  | 17      | 10      | 4        | 87          |
| Frequency of generalized seizures | 73  | 18      | 5       | 17       | 60.7        |
| Frequency of cluster seizures     | 95  | 3.2     | 5       | 15       | 99.9        |
| Frequency of status epilepticus   | 46  | 7.5     | 0       | 3        | 99.8        |
| Activity level of the dog         | 67  | 17      | 7       | 5        | 61.7        |
| Burden of medication on the dog   | 96  | 96      | 95      | 95       | 0.69        |
| Appetite of the dog               | 86  | 56      | 49      | 50       | 39.9        |
| Ataxia in the dog                 | 29  | 35      | 34      | 20       | -2.3        |
| Conscious level in the dog        | 70  | 25      | 20      | 5        | 76.2        |
| QOL of the dog                    | 83  | 5.4     | 15      | 5        | 89.8        |
| QOL of the owner                  | 81  | 4.3     | 13      | 7        | 73.5        |
| Satisfaction with surgery         | NA  | 2.2     | 0       | 1        | 96.8        |

Values are actual measurements (mm) except the improved percentage. Pre, preoperative; Post 3, 6, and 12 months; postoperative months; QOL, quality of life; NA, not applicable. \* Improved percentage (%) =  $100 - \{(\text{average of 3 postoperative values}) \times 100 / \text{pre-operative value}\}$ .

**Table S3.** Changes of VAS score in Case 3

| Questions (mm)                    | Pre |
|-----------------------------------|-----|
| Frequency of focal seizures       | 80  |
| Frequency of generalized seizures | 45  |
| Frequency of cluster seizures     | 98  |
| Frequency of status epilepticus   | 48  |
| Activity level of the dog         | 95  |
| Burden of medication on the dog   | 75  |
| Appetite of the dog               | 67  |
| Ataxia in the dog                 | 80  |
| Consciousness level in the dog    | 90  |
| QOL of the dog                    | 71  |
| QOL of the owner                  | 95  |
| Satisfaction with surgery         | NA  |

This case died immediately after the surgery, therefore, only preoperative VAS is available.
